# Supplementary material for: Prevalence and Factors Associated with Falls among Older Outpatients
Source: PubMed Central journal article supplement (PMC8070134; doi:10.3390/ijerph18084041), 2021-04-12
Supplement: ijerph-18-04041-s001.pdf [file ijerph-18-04041-s001.pdf]

## Supplement: Directed Acyclic Graphs

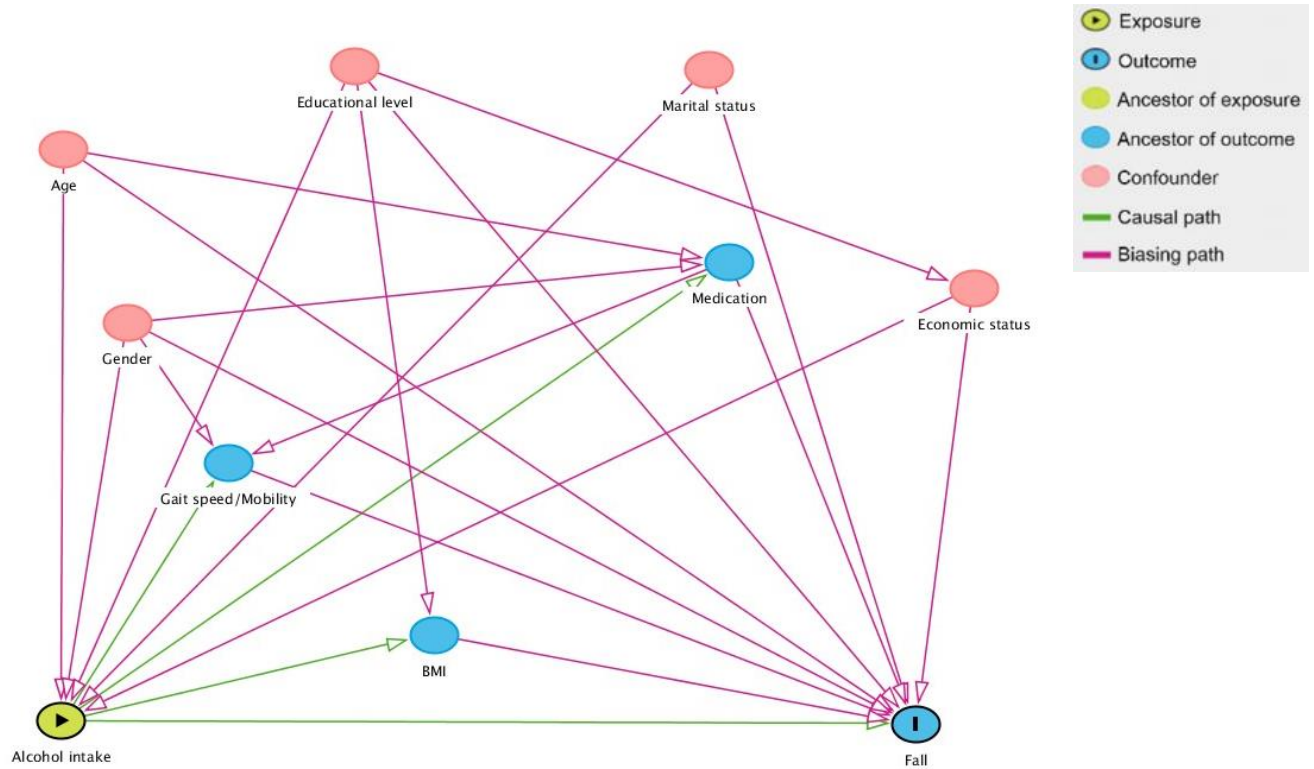

**Fig 1S.** Directed Acyclic Graphs for causal inference framework of alcohol intake to fall among older outpatient. Minimal Sufficient Adjustment Sets: age, gender, educational level, marital status and economic status. The graph was drawn from <https://www.dagitty.net>

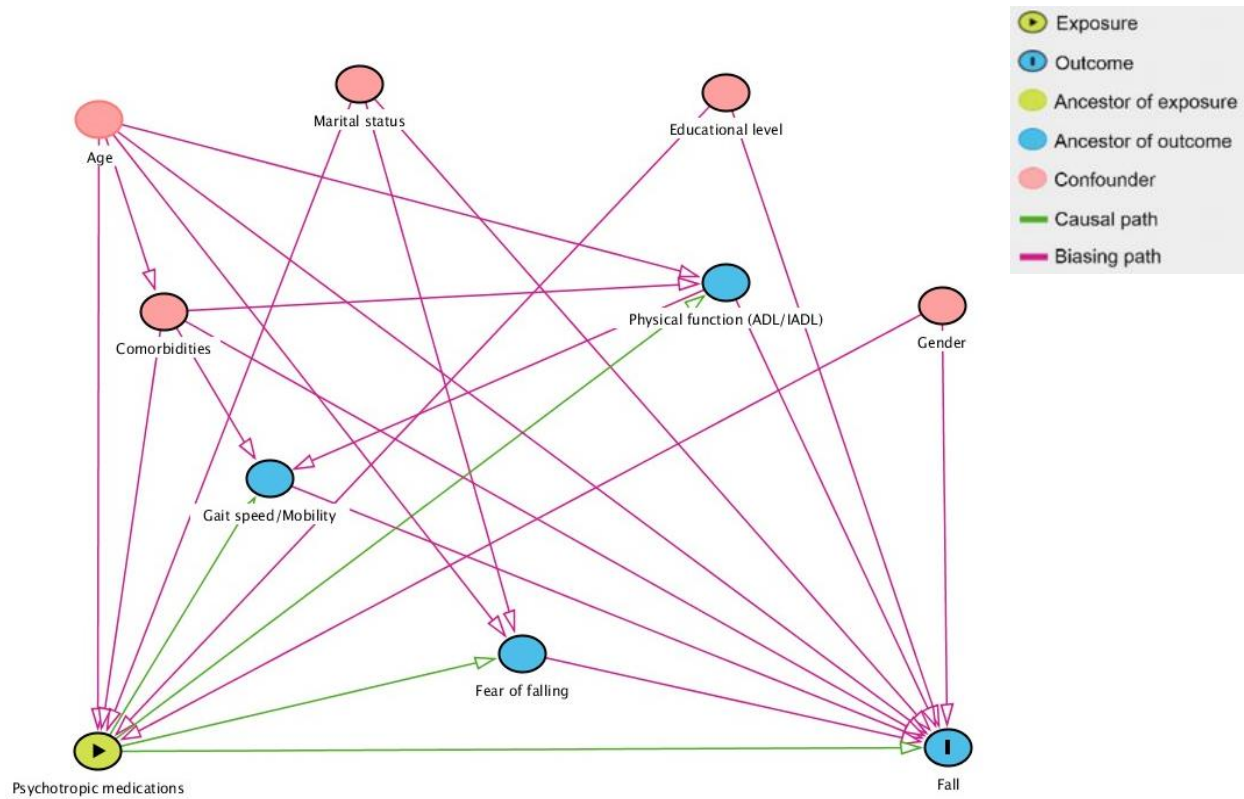

**Fig 2S.** Directed Acyclic Graphs for causal inference framework of psychotropic medications to fall among older outpatient. Minimal Sufficient Adjustment Sets: age, gender, educational level, marital status and comorbidities. The graph was drawn from <https://www.dagitty.net>

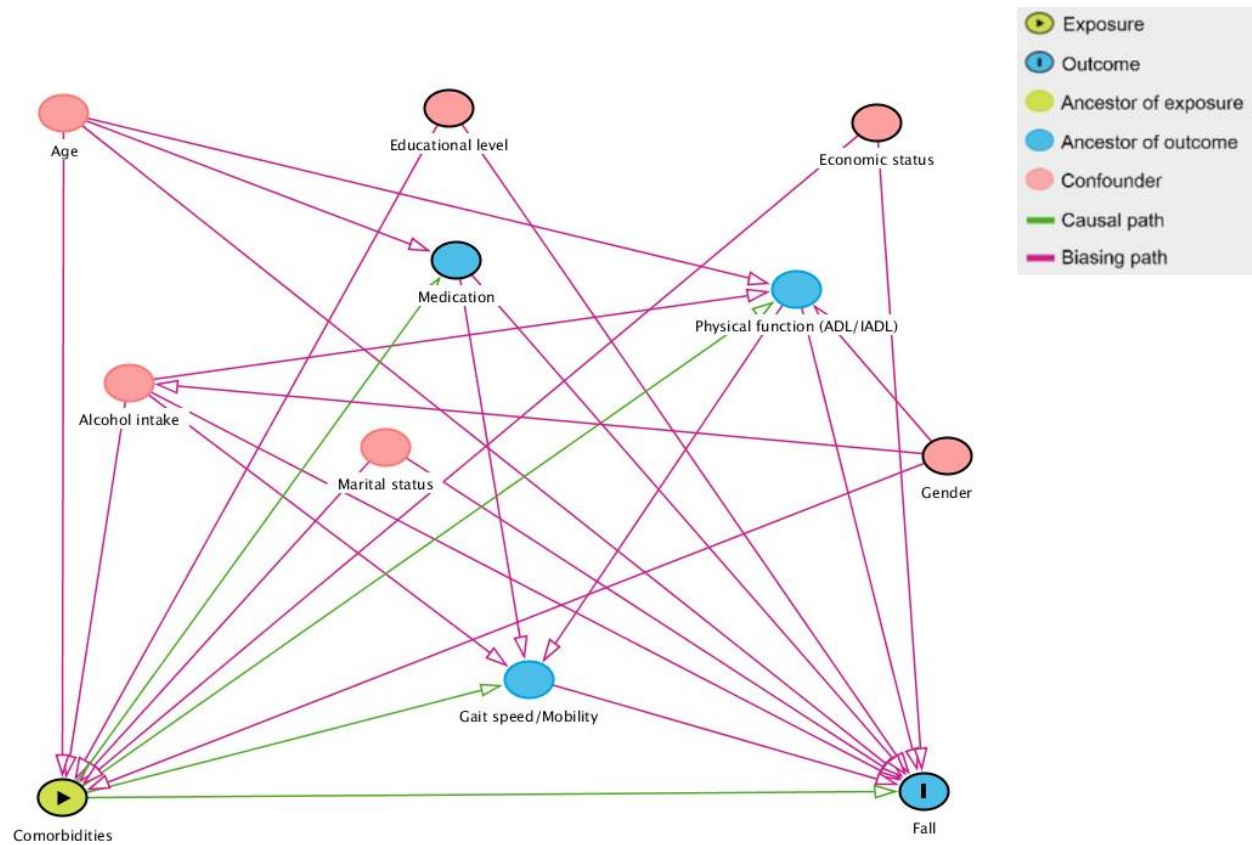

**Fig 3S.** Directed Acyclic Graphs for causal inference framework of comorbidities to fall among older outpatient. Minimal Sufficient Adjustment Sets: age, gender, educational level, marital status, economic status and alcohol intake. The graph was drawn from <https://www.dagitty.net>

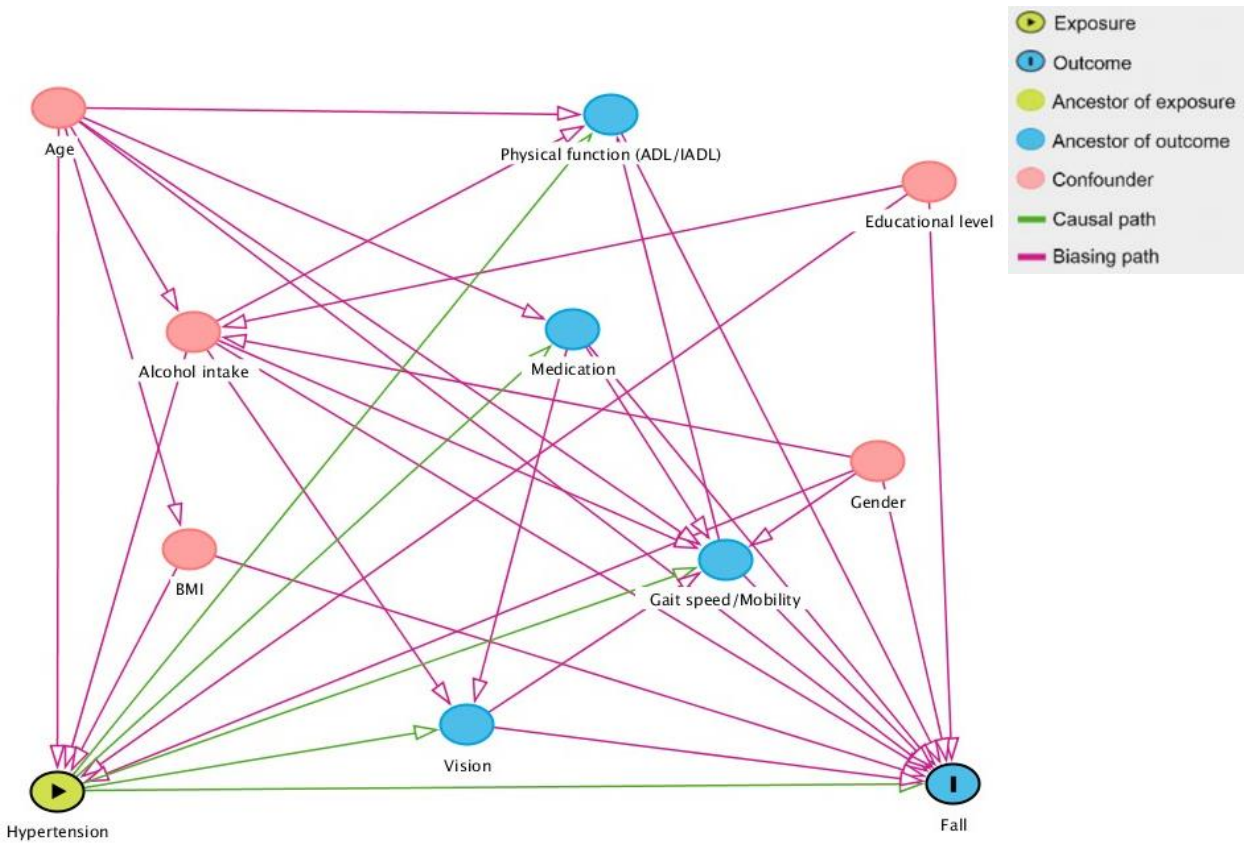

**Fig 4S.** Directed Acyclic Graphs for causal inference framework of hypertension to fall among older outpatient. Minimal Sufficient Adjustment Sets: age, gender, educational level, BMI and alcohol intake. The graph was drawn from <https://www.dagitty.net>

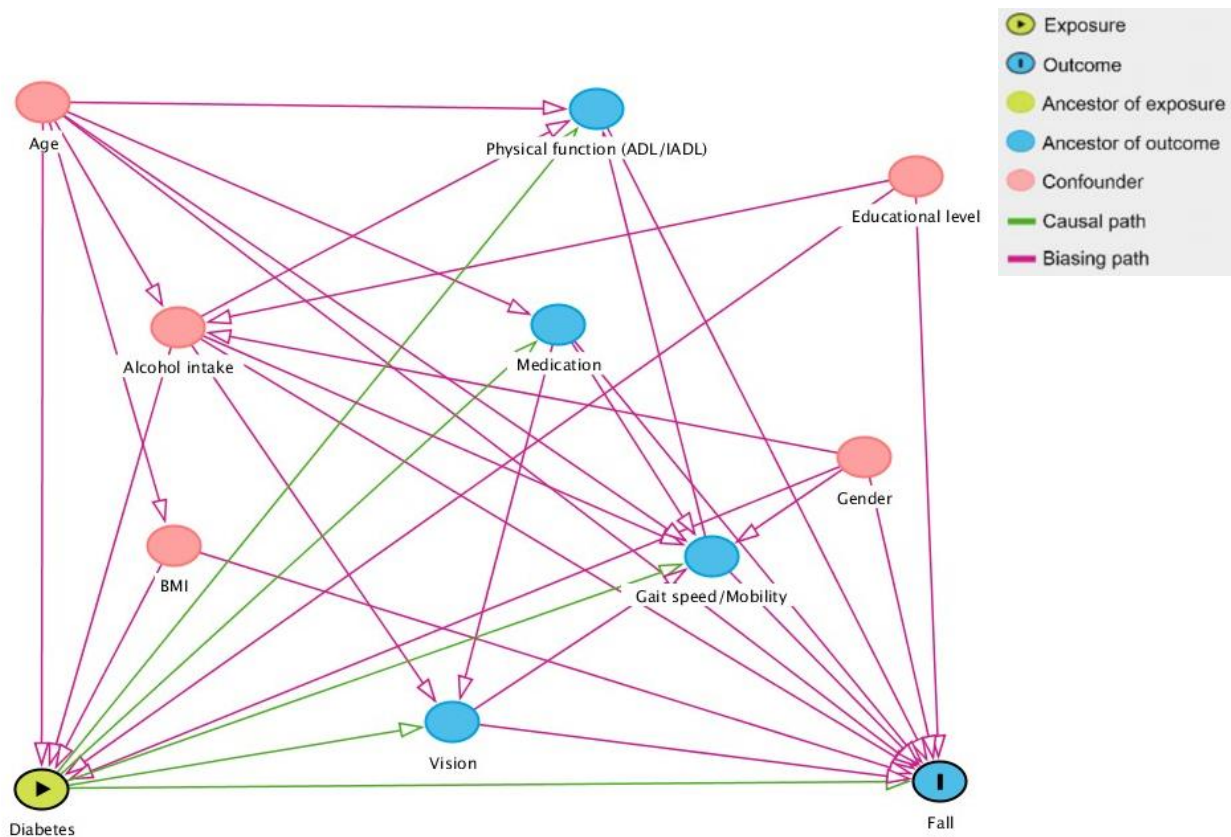

**Fig 5S.** Directed Acyclic Graphs for causal inference framework of diabetes to fall among older outpatient. Minimal Sufficient Adjustment Sets: age, gender, educational level, BMI and alcohol intake. The graph was drawn from <https://www.dagitty.net>



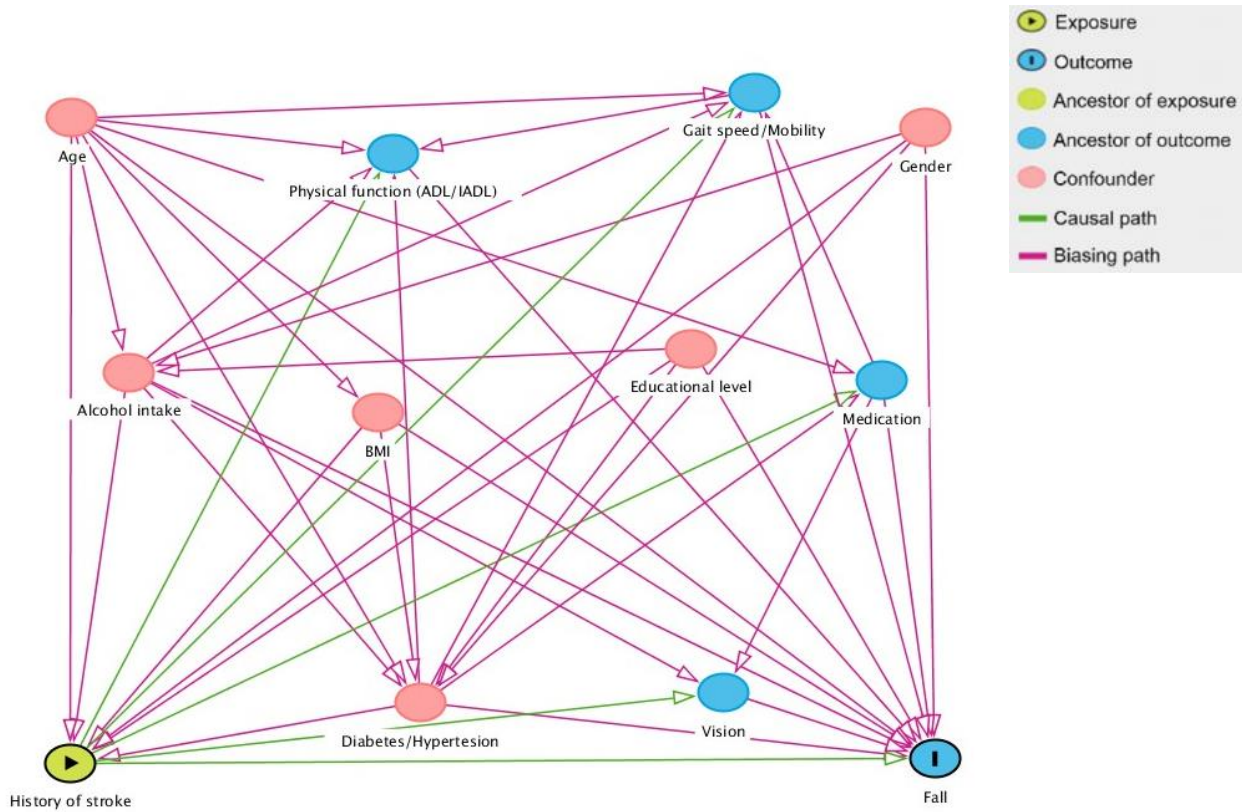

**Fig 6S.** Directed Acyclic Graphs for causal inference framework of history of stroke to fall among older outpatient. Minimal Sufficient Adjustment Sets: age, gender, educational level, BMI, alcohol intake, diabetes and hypertension. The graph was drawn from <https://www.dagitty.net>

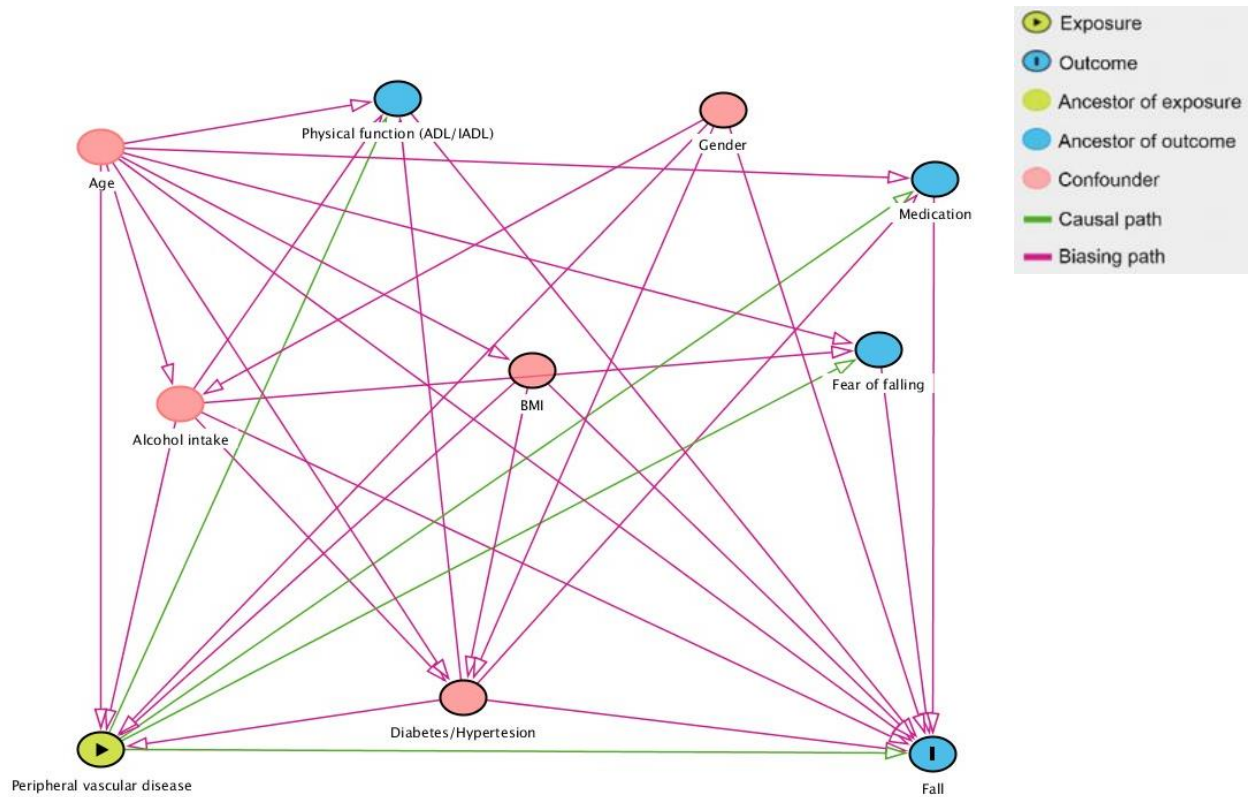

**Fig 7S.** Directed Acyclic Graphs for causal inference framework of peripheral vascular disease to fall among older outpatient. Minimal Sufficient Adjustment Sets: age, gender, BMI, alcohol intake, diabetes and hypertension. The graph was drawn from <https://www.dagitty.net>

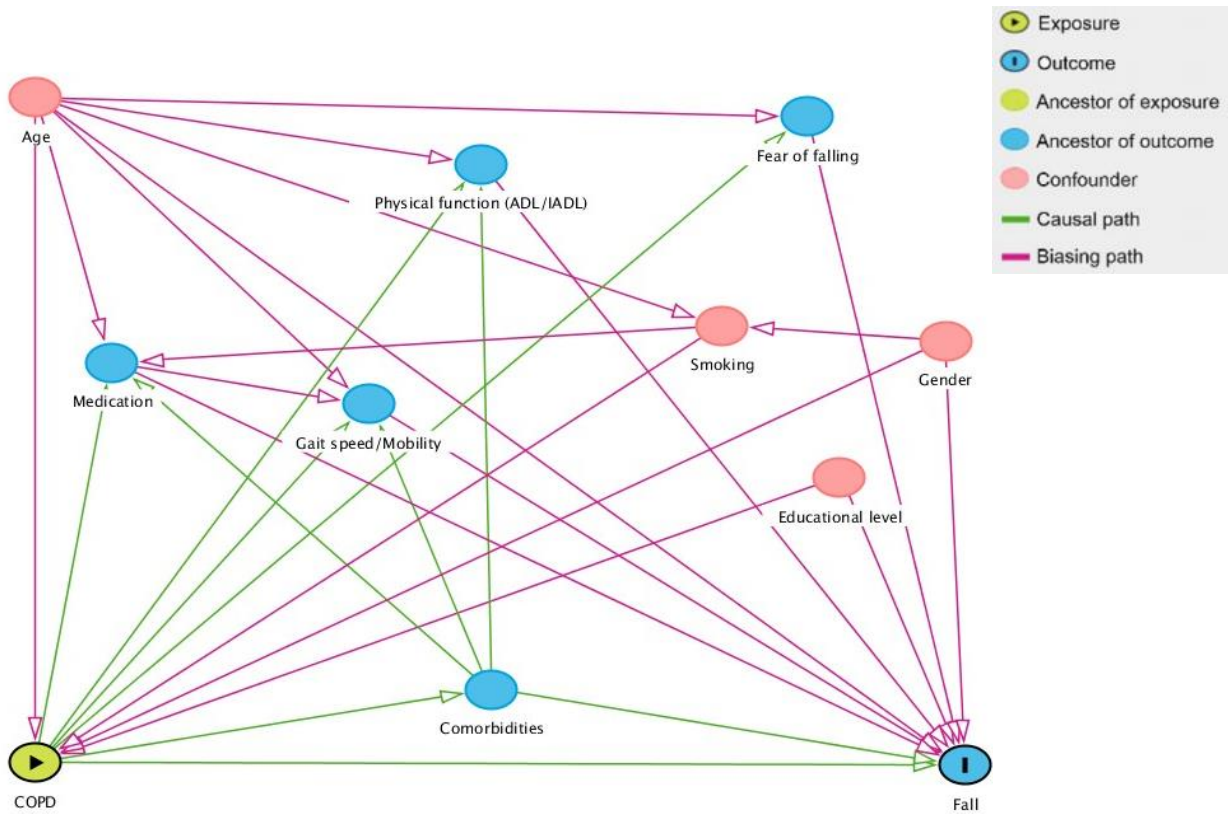

**Fig 8S.** Directed Acyclic Graphs for causal inference framework of COPD to fall among older outpatient. Minimal Sufficient Adjustment Sets: age, gender, educational level and smoking. The graph was drawn from <https://www.dagitty.net>



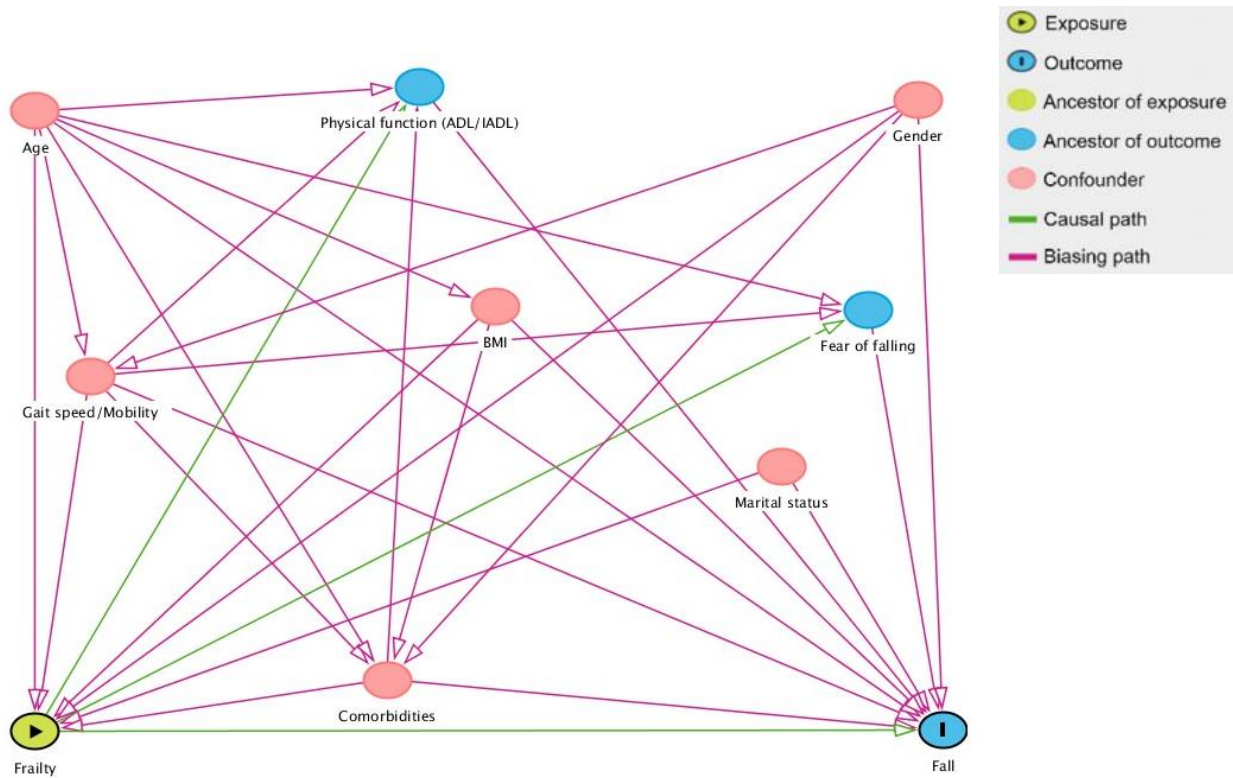

**Fig 9S.** Directed Acyclic Graphs for causal inference framework of frailty to fall among older outpatient. Minimal Sufficient Adjustment Sets: age, gender, BMI, marital status, comorbidities, gait speed and mobility. The graph was drawn from <https://www.dagitty.net>

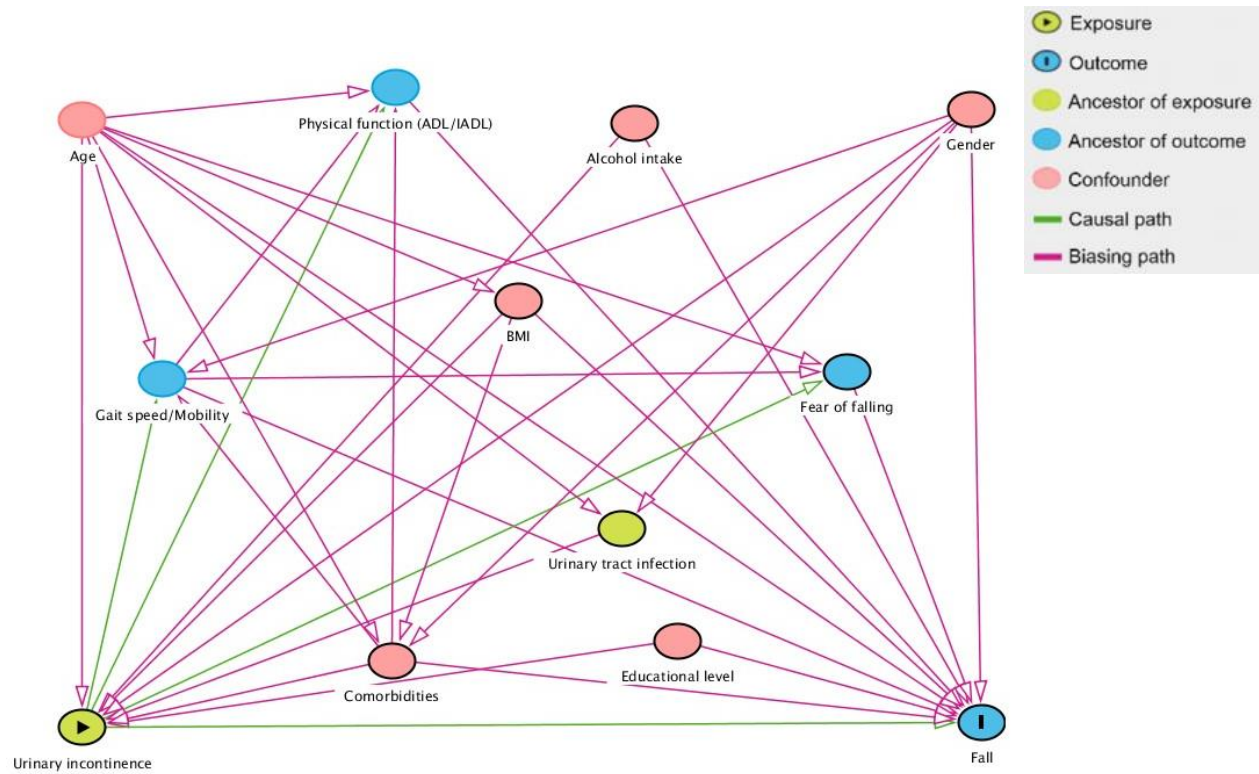

**Fig 10S.** Directed Acyclic Graphs for causal inference framework of urinary incontinence to fall among older outpatient. Minimal Sufficient Adjustment Sets: age, gender, BMI, educational level, comorbidities and alcohol intake. The graph was drawn from <https://www.dagitty.net>

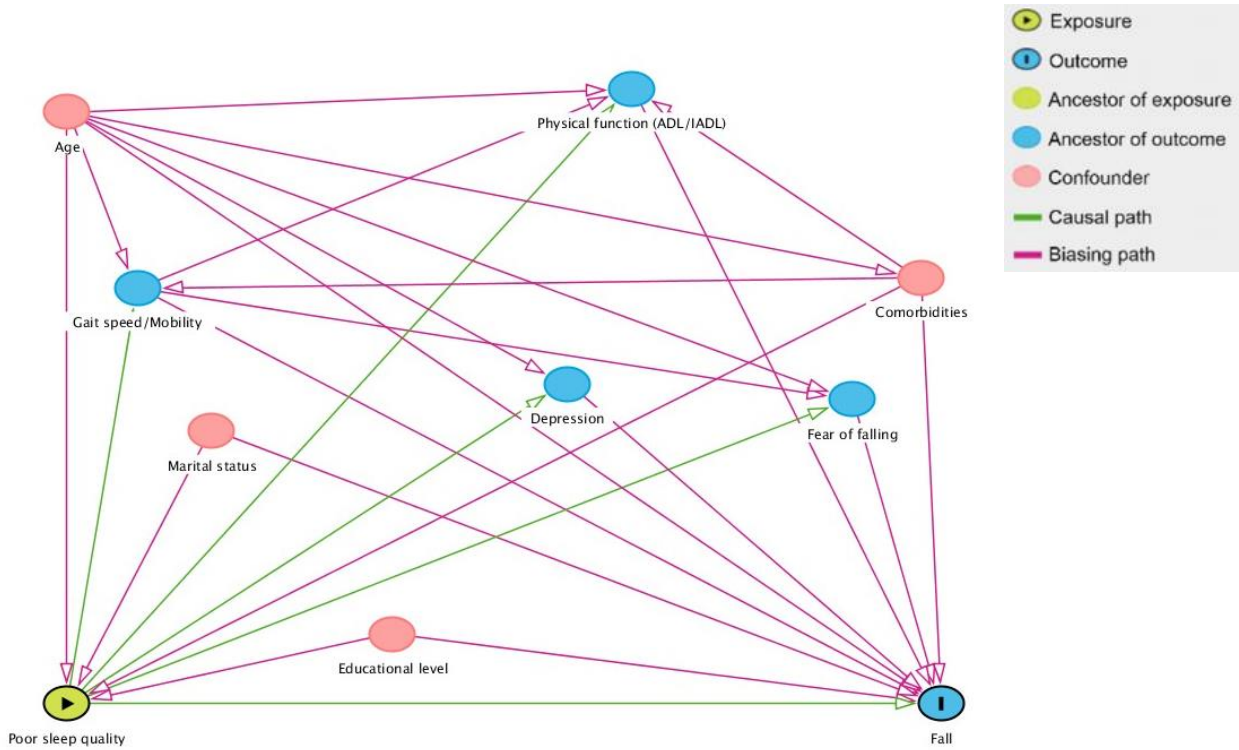

**Fig 11S.** Directed Acyclic Graphs for causal inference framework of poor sleep quality to fall among older outpatient. Minimal Sufficient Adjustment Sets: age, educational level, comorbidities, marital status. The graph was drawn from <https://www.dagitty.net>

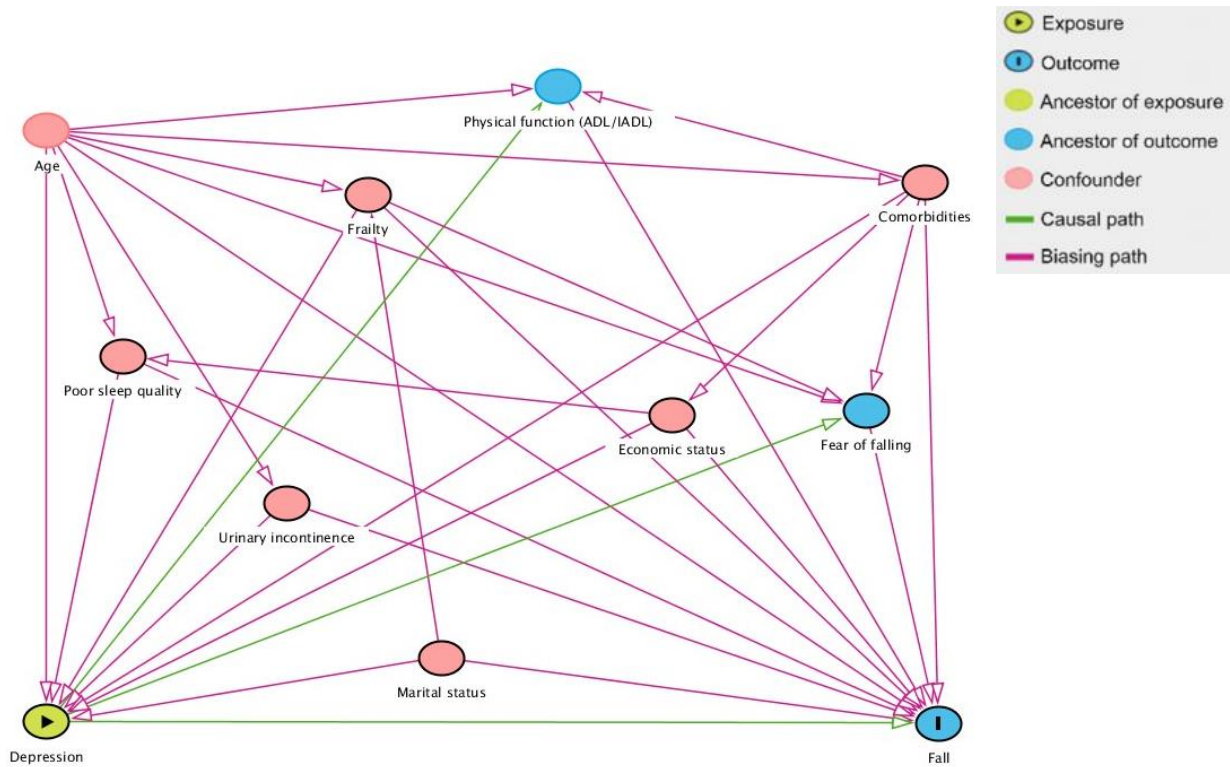

**Fig 12S.** Directed Acyclic Graphs for causal inference framework of depression to fall among older outpatient. Minimal Sufficient Adjustment Sets: age, comorbidities, marital status, poor sleep quality, economic status, frailty and urinary incontinence. The graph was drawn from <https://www.dagitty.net>

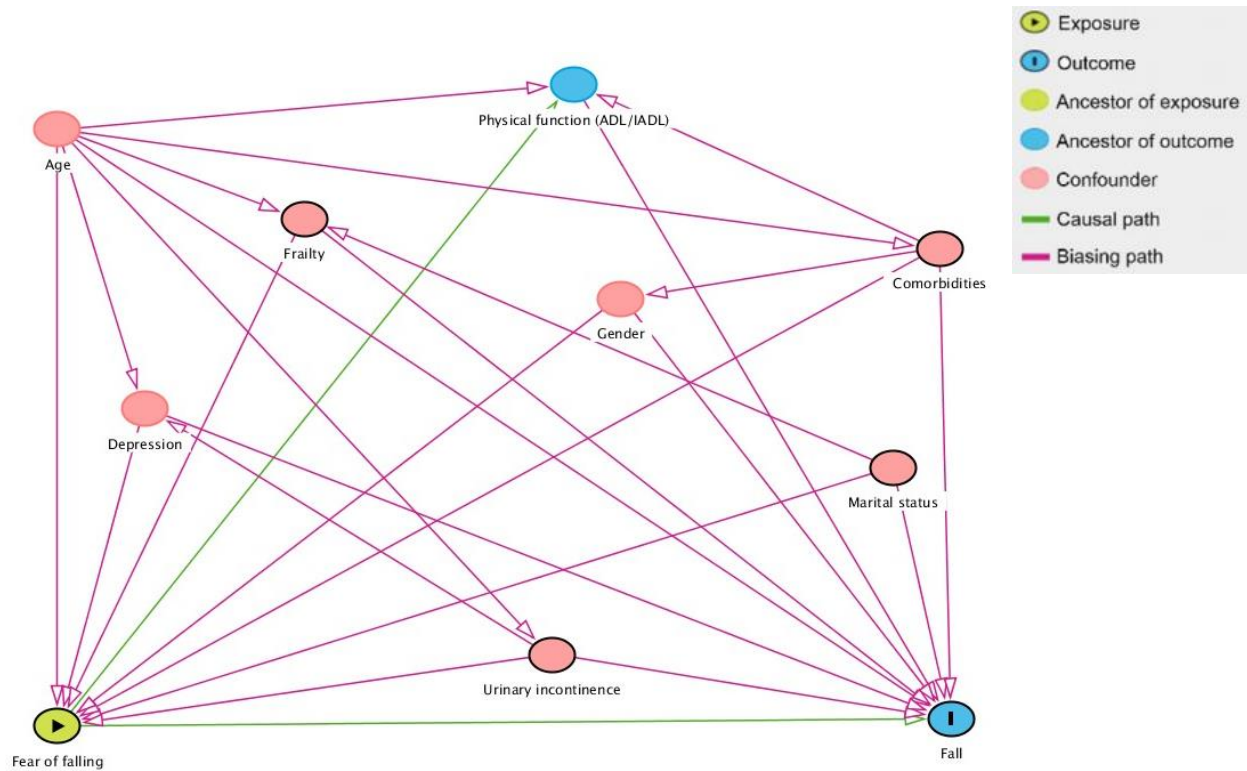

**Fig 13S.** Directed Acyclic Graphs for causal inference framework of fear of falling to fall among older outpatient. Minimal Sufficient Adjustment Sets: age, gender, comorbidities, marital status, frailty, urinary incontinence and depression. The graph was drawn from <https://www.dagitty.net>



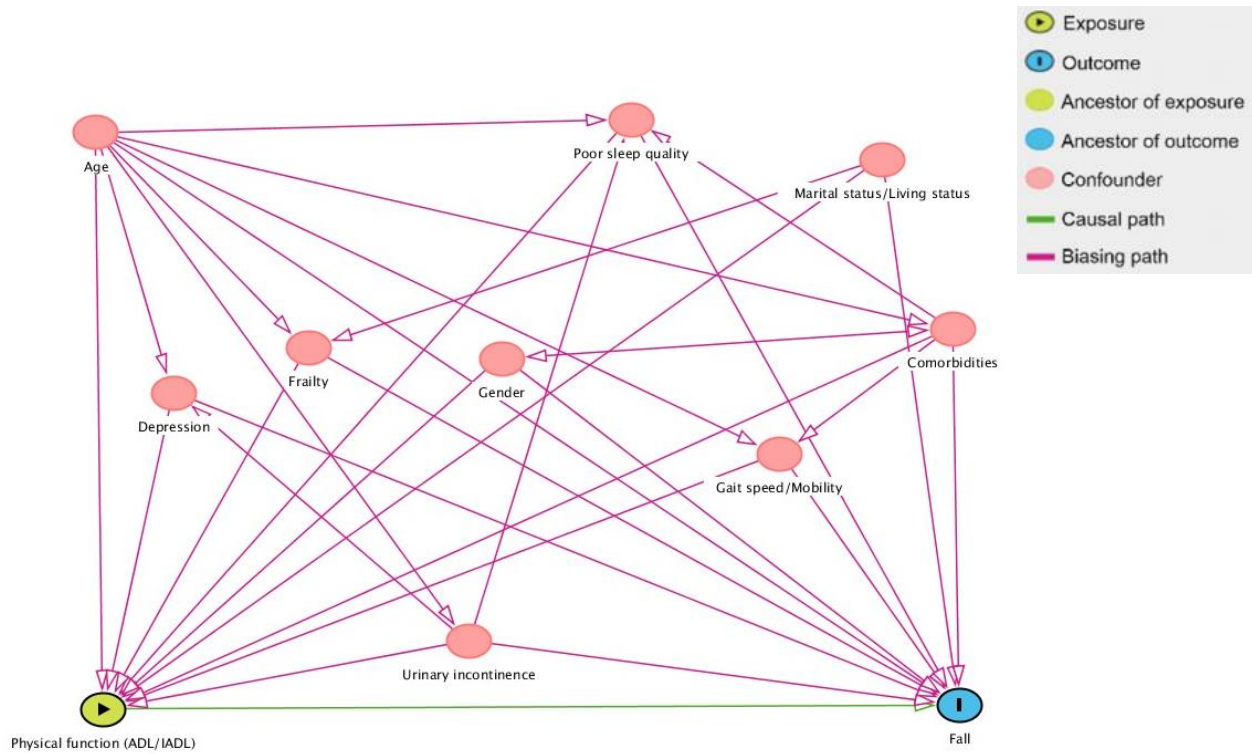

**Fig 14S.** Directed Acyclic Graphs for causal inference framework of physical function (ADL/IADL) to fall among older outpatient. Minimal Sufficient Adjustment Sets: age, gender, comorbidities, marital status, frailty, urinary incontinence, depression, gait speed, mobility and poor sleep quality. The graph was drawn from <https://www.dagitty.net>

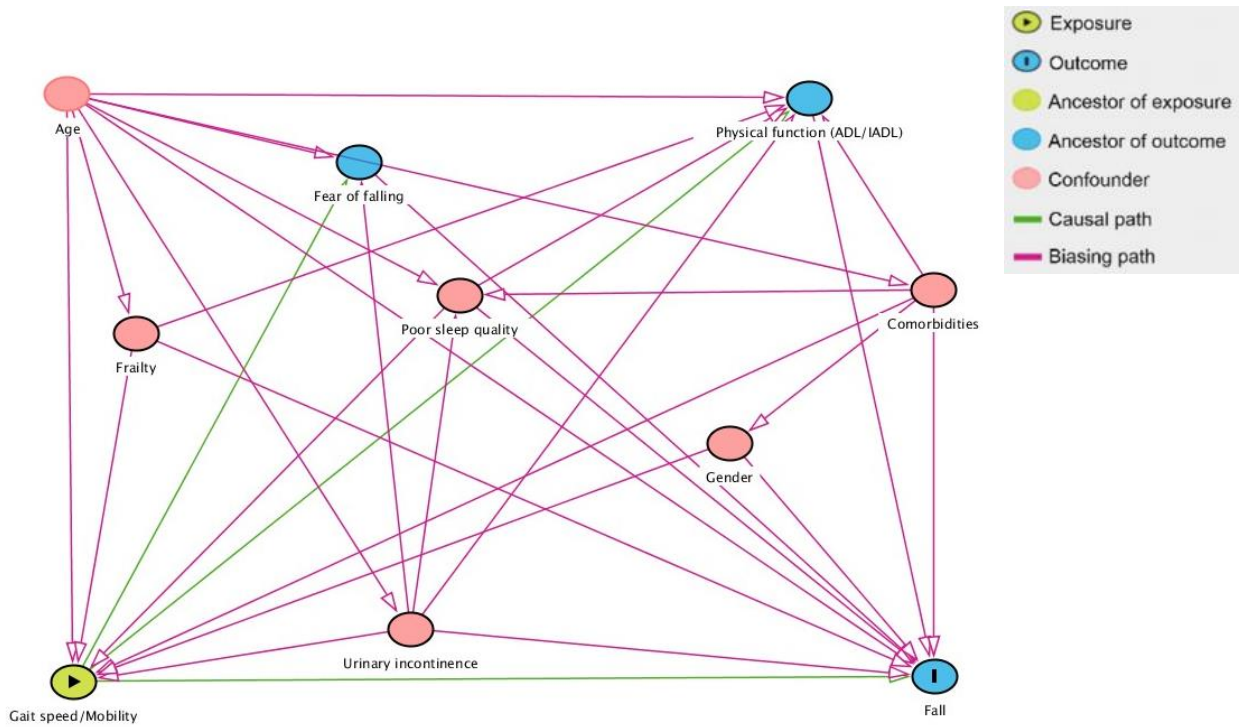

**Fig 15S.** Directed Acyclic Graphs for causal inference framework of physical function (ADL/IADL) to fall among older outpatient. Minimal Sufficient Adjustment Sets: age, gender, comorbidities, frailty, urinary incontinence and poor sleep quality. The graph was drawn from <https://www.dagitty.net>
